# Supplementary material
Source: MDPI journal article supplement (https://www.mdpi.com/2076-3417/13/21/11860)
Supplement: s1 [file s1]

# **Biomonitoring of Potentially Toxic Elements in an Abandoned Mining Region using *Taraxacum officinale*: A Case Study on the “Tsar Asen” Mine in Bulgaria**

**Veronika Mihaylova<sup>1</sup>, Galina Yotova<sup>1</sup>, Kristina Marinova<sup>1</sup>, Aleksey Benderev<sup>2</sup>, Valentina Lyubomirova<sup>1</sup> and Stefan Tsakovski<sup>1,\*</sup>**

<sup>1</sup> Faculty of Chemistry and Pharmacy, Sofia University “St. Kliment Ohridski”, 1 J. Bourchier Blvd., 1164 Sofia, Bulgaria; v.mihaylova@chem.uni-sofia.bg (V.M.); g.yotova@chem.uni-sofia.bg (G.Y.); marinova\_99@abv.bg (K.M.); vlah@chem.uni-sofia.bg (V.L.)

<sup>2</sup> Geological Institute, Bulgarian Academy of Sciences, Acad. G. Bonchev str., Bl. 24, 1113 Sofia, Bulgaria; alekseybenderev@yahoo.com

\* Correspondence: stsakovski@chem.uni-sofia.bg

**Table S1.** Comparison of the ICP-MS results obtained of plant, soil and sediment reference materials with certified/literature values and experimentally determined detection limits.

| Elem.  | CRM DC73348 [ $\mu\text{g g}^{-1}$ ] |                           | SRM NIST 1547 [ $\mu\text{g g}^{-1}$ ] |                            | IAEA-Soil-5 [ $\mu\text{g g}^{-1}$ ] |                           | STSD-4 [ $\mu\text{g g}^{-1}$ ] |                           | DL<br>[ng mL <sup>-1</sup> ] |
|--------|--------------------------------------|---------------------------|----------------------------------------|----------------------------|--------------------------------------|---------------------------|---------------------------------|---------------------------|------------------------------|
|        | Experimental                         | Certified or<br>published | Experimental                           | Certified or<br>published  | Experimental                         | Certified or<br>published | Experimental                    | Certified or<br>published |                              |
| Ag     | 0.025±0.005                          | 0.027±0.006               | 0.0011±0.0004                          | 0.0013; 0.003 <sup>#</sup> | 2.07±0.08                            | (1.9)                     | 0.4±0.1                         | <0.5                      | 0.065                        |
| Al     | 0.23±0.05%                           | 0.214±0.022 %             | 246±7                                  | 248.9±6.5                  | 8.2±0.2                              | 8.19±0.28%                | 6.1±0.3%                        | 6.40%                     | 0.07                         |
| As     | 0.98±0.12                            | 0.95±0.12                 | 0.052±0.012                            | 0.062±0.014                | 99.5±0.4                             | 93.9±9.5                  | 14±1                            | 15                        | 0.013                        |
| Ba     | 20±3                                 | 19±3                      | 121±3                                  | 123.7±5.5                  | 558±10                               | 561±53                    | 2073±120                        | 2000                      | 0.09                         |
| Be     | 0.047±0.012                          | 0.056±0.014               | 0.0088±0.0002                          | 0.0089 <sup>#</sup>        | 1.72±0.04                            | 1.77±0.27                 | 1.65±1.7                        | 1.7                       | 0.011                        |
| Bi     | 0.022±0.005                          | (0.022)                   | 0.012±0.001                            | 0.0015; 0.002 <sup>#</sup> | 13.4±0.6                             | (12)                      | 2.3±0.2                         | -                         | 0.002                        |
| Ca [%] | 2.23±0.14                            | 2.22±0.13                 | 1.52±0.02                              | 1.559±0.016                | 2.32±0.16                            | (2.2)                     | 2.7±0.2                         | 2.85                      | 0.78                         |
| Cd     | 0.12±0.06                            | 0.14±0.06                 | 0.024±0.003                            | 0.0261±0.0022              | 1.45±0.06                            | (1.5)                     | 1.1±0.2                         | -                         | 0.002                        |
| Co     | 0.36±0.05                            | 0.39±0.05                 | 0.067±0.008                            | (0.07)                     | 14.4±0.6                             | 14.8±0.76                 | 12±1                            | 13                        | 0.011                        |
| Cr     | 2.2±0.2                              | 2.3±0.3                   | 1.01±0.08                              | (1)                        | 29.0±0.5                             | 28.9±2.8                  | 92±8                            | 93                        | 0.05                         |
| Cu     | 5.1±0.5                              | 5.2±0.5                   | 3.7±0.4                                | 3.75±0.37                  | 78.2±0.8                             | 77.1±4.7                  | 69±6                            | 65                        | 0.045                        |
| Fe     | 1050±57                              | 1020±67                   | 228±12                                 | 219.8±6.8                  | 4.31±0.24                            | 4.45±0.19%                | 4.4±0.3%                        | 4.1%                      | 1.3                          |
| K [%]  | 0.81±0.04                            | 0.85±0.05                 | 2.42±0.03                              | 2.433±0.038                | 1.81±0.12                            | 1.86±0.15                 | 1.41±0.4                        | 1.32                      | 1.01                         |
| La     | 1.28±0.10                            | 1.23±0.10                 | 8.9±0.7                                | (9)                        | 27.3±0.9                             | 28.1±1.5                  | 22.5±2.5                        | 24                        | 0.012                        |
| Mg [%] | 0.27±0.02                            | 0.287±0.018               | 0.44±0.01                              | 0.432±0.015                | 1.6±0.1                              | (1.50)                    | 1.29±0.03                       | 1.24                      | 0.03                         |
| Mn     | 53±5                                 | 58±6                      | 95±3                                   | 97.8±1.8                   | 873±25                               | 852±37                    | 1580±90                         | 1520                      | 0.011                        |
| Mo     | 0.25±0.04                            | 0.26±0.04                 | 0.058±0.007                            | 0.0603±0.0068              | 1.81±0.05                            | (1.7)                     | 3.8±0.2                         | <5                        | 0.025                        |
| Na     | 1.08±0.11%                           | 1.10±0.10%                | 27±3                                   | 23.8±1.6                   | 1.89±0.14%                           | 1.92±0.11%                | 2.2±0.2%                        | 2.0%                      | 1.98                         |

|    |             |              |              |                             |              |           |            |        |       |
|----|-------------|--------------|--------------|-----------------------------|--------------|-----------|------------|--------|-------|
| Ni | 1.73±0.04   | 1.7±0.4      | 0.68±0.07    | 0.689±0.095                 | 14.6±0.7     | (13)      | 32±3       | 30     | 0.02  |
| P  | 820±50      | 830±40       | 0.136±0.008% | 1371±82                     | 0.137±0.006% | (0.11)%   | 0.09±0.01% | 0.087% | 0.25  |
| Pb | 7.2±1.0     | 7.1±1.1      | 0.89±0.03    | 0.869±0.018                 | 132±4        | 129±26    | 17±2       | 16     | 0.44  |
| Rb | 4.3±0.2     | 4.2±0.2      | 18.7±1.1     | 19.65±0.89                  | 142±6        | 138±7.4   | 38±2       | 39     | 0.013 |
| Sb | 0.079±0.02  | 0.078±0.020  | 0.022±0.003  | (0.02)                      | 14.1±0.4     | 14.3±2.2  | 7.9±0.2    | 7.3    | 0.024 |
| Se | 0.18±0.01   | 0.184±0.013  | 0.13±0.01    | 0.120±0.017                 | 1.6±0.3      | (1.4)     | 20±2       | -      | 0.11  |
| Sn | 0.31±0.06   | 0.33±0.08*   | 0.08±0.01    | (<0.2); 0.089 <sup>#</sup>  | 13.2±0.2     | -         | 2.1±0.2    | 2      | 0.078 |
| Th | 0.38±0.02   | 0.37±0.02    | 0.038±0.002  | (0.05); 0.039 <sup>#</sup>  | 11.9±0.7     | 11.3±0.73 | 4.2±0.1    | 4.3    | 0.08  |
| Ti | 90±12       | 95±18        | 18±6         | 7.58 <sup>#</sup>           | 0.51±0.04%   | (0.47)%   | 4465±140   | 4530   | 1.5   |
| Tl | 0.023±0.002 | 0.021±0.002* | 0.021±0.002  | 0.018; 0.020 <sup>#</sup>   | 0.71±0.01    | -         | <0.012     | -      | 0.012 |
| U  | 0.11±0.01   | (0.11)       | 0.012±0.002  | (0.015); 0.010 <sup>#</sup> | 2.78±0.03    | 3.04±0.51 | 2.8±0.1    | 3      | 0.013 |
| V  | 2.5±0.3     | 2.4±0.3      | 0.33±0.03    | 0.367±0.038                 | 152±1        | (151)     | 98±15      | 106    | 0.032 |
| Zn | 20.1±2.2    | 20.6±2.2     | 18.0±0.4     | 17.97±0.53                  | 374±7        | 368±8.2   | 119±9      | 107    | 0.08  |

() Information value

\*results obtained in [39]

#-results obtained in [45-47]
